# Supplementary material for: Synthesis and glycosidase inhibitory activity of new hexa-substituted C8-glycomimetics
Source: Beilstein J Org Chem. 2005 Oct 7;1:12. doi: 10.1186/1860-5397-1-12 (PMC1399460; doi:10.1186/1860-5397-1-12)
Supplement: File 1 — Additional information. [file Beilstein_J_Org_Chem-01-12-s001.doc]

# Experimental

1H NMR (250 MHz) and 13C NMR (63 MHz) spectra were recorded on a Bruker AM250 in CDCl3 (unless indicated). Chemical shifts () are reported in ppm and coupling constants are given in Hz. Optical rotations were measured on a Perkin-Elmer 241C polarimeter with sodium (589 nm) or mercury (365 nm) lamp. Mass spectra, chemical ionization (CI), and high resolution (HRMS) were recorded by the Service de Spectrométrie de Masse, Ecole Normale Supérieure, Paris. All reactions were carried out under an argon atmosphere, and were monitored by thin-layer chromatography with Merck 60F-254 precoated silica (0.2 mm) on glass. Flash chromatography was performed with Merck Kieselgel 60 (0.2-0.5 mm); the solvent system were given v/v. spectroscopic; (1H and 13C NMR, MS) and/or analytical data were obtained using chromatographically homogeneous samples.

**1- General procedure for dihydroxylation**

To a solution of cyclooctene (1.40 mmol) in acetone (20 mL) and *tert*-butanol (8 mL) was added *N*-methylmorpholine oxide (2.8 mmol, 2 equiv.). After stirring at 20°C for 20 min., osmium tetroxide (0.5 M aqueous solution, 0.056 mmol, 4 mol%) was added. After stirring at 20°C for 4h, sodium sulfite (3.50 mmol, 2.5 equiv.) was added. The mixture was filtered and the filtrate was concentrated in vacuo. Flash chromatography of the crude led to the corresponding pure *syn-*diol.

**1.1- (1*S*,2*S*,3*S*,4*S*,6*R*,7*S*)-1,4-Di-*O*-*tert*-butyldimethylsilyl-2,3-*O*-methylethylidene-cyclooctane-1,2,3,4,6,7-hexol (3).**

Isolated yield: 97%; *Rf* 0.3 (cyclohexane/EtOAc 9:1); mp 110°C; []D= +35 (*c*1.0, CH2Cl2); 1H NMR ** 4.06 (dddd, 1H, *J*8,1= 3.5 Hz, *J*8,7a= 4.0 Hz, *J*8,7b= 10.4 Hz, *J*8,OH= 4.1 Hz, H8), 3.95-3.80 (m, 3H, H1,3,6), 3.75 (dd, 1H, *J*4,3= 8.0 Hz, *J*4,5= 8.8 Hz, H4), 3.65 (dd, 1H, *J*5,4= 8.8 Hz, *J*5,6= 7.0 Hz, H5), 2.29 (d, 1H, *J*OH,8= 4.1 Hz, OH8), 2.18 (ddd, 1H, *J*2a,1= *J*2a,3= 9.0 Hz, *J*2a,2b= 15.3 Hz, H2a), 1.98 (ddd, 1H, *J*7a,6= 5.8 Hz, *J*7a,7b= 14.8 Hz, *J*7a,8= 4.0 Hz,H7a), 1.88-1.76 (m, 1H, H7b), 1.70 (ddd, 1H, *J*2b,1= 4.2 Hz, *J*2b,2a= 15.3 Hz, *J*2b,3= 2.0 Hz, H2b), 1.32, 1.31 (2s, 6H, CH3), 0.88, 0.87 (2s, 18H, Si*t*Bu), 0.09, 0.07 (2s, 12H, SiMe2); 13C NMR **108.0 (CMe2), 82.1 (C5), 81.5 (C4), 75.2 (C3), 72.8 (C6), 69.3 (C1), 68.5 (C8), 36.4 (C2,7), 27.0, 26.7 (CMe2), 25.8 (SiC(CH3)3), 18.1 (SiC(CH3)3), -4.3, -4.5, -5.1 (SiMe2); Anal. calcd for C23H48O6Si2: C, 57.94; H, 10.15; found C, 58.00; H, 10.15.

**1.2- (1*R*,2*S*,3*S*,4*R*,6*R*,7*S*)-1,4-Di-*O*-*tert*-butyldimethylsilyl-2,3-*O*-methylethylidene-cyclooctane-1,2,3,4,6,7-hexol (4).**

Isolated yield: 97%; *Rf* 0.25 (cyclohexane/EtOAc 8:2); mp 120°C; []D= -29 (*c*1.0, CH2Cl2); 1H NMR ** 4.37 (ddd, 1H, *J*8,1= 1.4 Hz, *J*8,7a= 7.9 Hz, *J*8,7b= 2.7 Hz, H8), 4.29 (ddd, 1H, *J*1,2a= 1.0 Hz, *J*1,2b= 8.3 Hz, *J*1,8= 1.4 Hz,H1), 4.11 (ddd, 1H, *J*6,5= 1.4 Hz, *J*6,7a= 7.4 Hz, *J*6,7b= 2.4 Hz,H6), 4.04 (dd, 1H, *J*4,3= 1.4 Hz, *J*4,5= 8.6 Hz, H4), 4.02-3.91 (m, 1H, H3), 3.97 (dd, 1H, *J*5,4= 8.6 Hz, *J*5,6= 1.4 Hz, H5), 2.30 (ddd, 1H, *J*7a,6= 7.4 Hz, *J*7a,7b= 15.5 Hz, *J*7a,8= 7.9 Hz, H7a), 2.15 (ddd, 1H, *J*2a,1= 1.0 Hz, *J*2a,2b= 15.0 Hz, *J*2a,3= 9.9 Hz, H2a), 1.99 (ddd, 1H, *J*2b,1= 8.3 Hz, *J*2b,2a= 15.0 Hz, *J*2b,3= 2.2 Hz, H2b), 1.77 (ddd, 1H, *J*7b,6= 2.4 Hz, *J*7b,7a= 15.5 Hz, *J*7b,8= 2.7 Hz, H7b), 1.34 (s, 6H, CH3), 0.92 (s, 18H, Si*t*Bu), 0.15, 0.12, 0.10 (3s, 12H, SiMe2); 13C NMR **106.7 (CMe2), 78.8 (C4,5), 76.8 (C3,6), 69.8 (C8), 67.0 (C1), 35.9 (C2,7), 27.2 (CMe2), 26.0, 25.9 (SiC(CH3)3), 18.1, 18.0 (SiC(CH3)3), -4.4, -4.6, -4.8, -4.9 (SiMe2); Anal. calcd for C23H48O6Si2: C, 57.94; H, 10.15; found C, 57.88; H, 10.14.

**2- Deprotection of the cyclooctanols**

The substrate (0.33 mmol) was stirred in a 9:1 solution of trifluoroacetic acid/H2O at 20°C for 15h. After concentration in vacuo, the resulting oily residue was triturated in diethyl ether and the supernatant was discarded to afford a brownish solid which was then purified by reverse phase chromatography (Sep-Pak® Cartridges, H2O/MeOH 1:1 to 1:5).

**2.1- (1*S*,2*R*,3*R*,4*S*,6*R*,7*S*)-cyclooctane-1,2,3,4,6,7-hexol (5).**

Isolated yield: 100%; []D +2 (*c*1.0, D2O); 1H NMR (D2O) **4.08 (ddd, 1H, *J*8,1= 3.2 Hz, *J*8,7a= 9.9 Hz, *J*8,7b= 4.8 Hz, H8), 3.96 (ddd, 1H, *J*1,2a= 9.2 Hz, *J*1,2b= 3.0 Hz, *J*1,8= 3.2 Hz, H1), 3.90 (ddd, 1H, *J*6,5= 8.7 Hz, *J*6,7a= 3.4 Hz, *J*6, 7b= 8.0 Hz, H6), 3.75 (ddd, 1H, *J*3,2a= 10.0 Hz, *J*3,2b= 3.0 Hz, *J*3,4= 8.7 Hz,H3), 3.53 (dd, 1H, *J*5,4= *J*5,6= 8.7 Hz,H5), 3.41 (dd, 1H, *J*4,3= *J*4,5= 8.7 Hz, H4), 2.18-1.95 (m, 1H, H2a), 2.12 (ddd, 1H, *J*7a,6= 3.4 Hz, *J*7a,7b= 15.0 Hz, *J*7a,8= 9.9 Hz, H7a), 1.99 (dddd, 1H, *J*7b,6= 8.0 Hz, *J*7b, 7a = 15.0 Hz, *J*7b,8= 4.8 Hz, H7b), 1.88 (ddd, 1H, *J*2b,1= 3.0 Hz, *J*2b, 2a= 15.1 Hz, *J*2b,3= 3.0 Hz,H2b); 13C NMR (D2O) **77.5 (C4), 76.3 (C5), 75.0 (C3), 73.1 (C6), 71.4 (C8), 70.4 (C1), 38.3 (C2), 37.7 (C7); HRMS for C8H17O6 (M++1): calcd 209.1025; found 209.1026.

**2.2- (1*R*,2*R*,3*R*,4*R*,6*R*,7*S*)-cyclooctane-1,2,3,4,6,7-hexol (6).**

Isolated yield: 83%; []D -11 (*c*1.0, D2O); 1H NMR (D2O) **4.34 (ddd, 1H, *J*3,2a= 8.4 Hz, *J*3,2b= 2.2 Hz, *J*3,4= 2.5 Hz, H3), 4.20-4.08 (m, 2H, H1,6), 3.95 (dd, 1H, *J*4,3= 2.5 Hz, *J*4,5= 8.2 Hz, H4), 3.89 (ddd, 1H, *J*8,1= *J*8,7b= 2.4 Hz, *J*8,7a= 10.1 Hz, H8), 3.68 (dd, 1H, *J*5,4= 8.2 Hz, *J*5,6= 2.1 Hz, H5), 2.28-2.02 (m, 1H, H7a), 2.09 (ddd, 1H, *J*2a,1= 2.0 Hz, *J*2a,2b= 15.6 Hz, *J*2a,3= 8.4 Hz,H2a), 1.93 (ddd, 1H, *J*2b,1= 7.4 Hz, *J*2b, 2a= 15.6 Hz, *J*2b,3= 2.2 Hz,H2b), 1.94-1.81 (m, 1H, H7b); 13C NMR (D2O) **76.5 (C4), 76.1 (C5), 72.3 (C8), 71.5 (C1), 71.0 (C6), 66.8 (C3), 37.1 (C7), 36.9 (C2); HRMS for C8H20NO6 (M++18): calcd 226.1291; found 226.1288.

**3- Formation of epoxides**

To a solution of cyclooctene (0.45 mmol) in CH2Cl2 (4 mL) were added sodium hydrogenocarbonate (1.04 mmol, 2.3 equiv.) and *meta*-chloroperbenzoic acid (purity 57 to 86 %, 0.81 mmol, 1.8 equiv.). After stirring at 20°C for 2h, a saturated sodium sulfite aqueous solution was added. After extraction of the mixture with CH2Cl2, the combined organic layers were washed with a 20% sodium sulfite aqueous solution, then with a 5% sodium hydrogenocarbonate aqueous solution, then with water, dried (MgSO4), filtered and concentrated in vacuo. Flash chromatography of the crude led to pure epoxide derivatives.

**3.1- (1*S*,2*S*,3*S*,4*S*,6*R*,7*S*)-6,7-Anhydro-1,4-di-*O*-*tert*-butyldimethylsilyl-2,3-*O*-methylethylidene-cyclooctane-1,2,3,4,6,7-hexol (7).**

Isolated yield: 96%; *Rf* 0.3 (cyclohexane/EtOAc 97:3); mp 70-71°C; []D= +31 (*c*1.0, CH2Cl2); 1H NMR ** 3.91-3.80 (m, 2H, H4,5), 3.74 (ddd, 1H, *J*3,2a= 2.7 Hz, *J*3,2b=8.6 Hz, *J*3,4= 11.4 Hz, H3), 3.54 (ddd, 1H, *J*6,5= 8.1 Hz, *J*6,7a= 3.8 Hz, *J*6,7b= 4.3 Hz, H6), 3.24 (ddd, 1H, *J*8,1= 4.2 Hz, *J*8,7a= 3.3 Hz, *J*8,7b= 11.0 Hz, H8), 2.91 (ddd, 1H, *J*1,2a= 4.7 Hz, *J*1,2b= 9.8 Hz, *J*1,8= 4.2 Hz, H1), 2.33 (ddd, 1H, *J*2a,1= 4.7 Hz, *J*2a,2b= 14.3 Hz, *J*2a,3= 2.7 Hz, H2a), 2.17 (ddd, 1H, *J*7a,6= 3.8 Hz, *J*7a,8= 3.3 Hz, *J*7a,7b= 14.1 Hz, H7), 1.60-1.30 (m, 2H, H2b,7b), 1.36, 1.32 (2s, 6H, CH3), 0.88, 0.87 (2s, 18H, Si*t*Bu), 0.09, 0.08 (2s, 12H, SiMe2); 13C NMR **107.8 (CMe2), 82.0, 81.5 (C4,5), 73.8, 72.5 (C3,6), 52.1, 51.3 (C1,8), 35.6, 31.9 (C2,7), 27.0, 26.6 (CMe2), 25.8, 25.7 (SiC(CH3)3), 18.3, 18.1 (SiC(CH3)3), -4.3, -4.4, -5.0, -5.2 (SiMe2); HRMS for C23H47O5Si2 (M++1): calcd 459.2962; found 459.2959.

**3.2- (1*R*,2*S*,3*S*,4*R*,6*R*,7*S*)-6,7-Anhydro-1,4-di-*O*-*tert*-butyldimethylsilyl-2,3-*O*-methylethylidene-cyclooctane-1,2,3,4,6,7-hexol (8).**

Isolated yield: 91%; *Rf* 0.3 (cyclohexane/CH2Cl2 8:4); mp 115-117°C; []D= -61 (*c*1.0, CH2Cl2); 1H NMR ** 4.31 (dd, 1H, *J*4,3= 3.1 Hz, *J*4,5= 7.7 Hz, H4), 4.28-4.20 (m, 1H, H6), 4.19 (ddd, 1H, *J*3,2a= 7.2 Hz, *J*3,2b= 2.9 Hz, *J*3,4= 3.1 Hz, H3), 3.99 (dd, 1H, *J*5,4= 7.7 Hz, *J*5,6= 1.8 Hz, H5), 3.14 (ddd, 1H, *J*1,2a= 4.5 Hz, *J*1,2b= 9.3 Hz, *J*1,8= 3.9 Hz, H1), 2.85 (ddd, 1H, *J*8,1= 3.9 Hz, *J*8,7a= 3.9 Hz, *J*8,7b= 11.3 Hz, H8), 2.55-2.40 (m, 2H, H2a,7a), 1.39, 1.37 (2s, 6H, CH3), 1.25 (ddd, 1H, *J*2b,1= 9.3 Hz, *J*2b,2a= 14.6 Hz, *J*2b,3= 2.9 Hz, H2b), 1.10 (ddd, 1H, *J*7b,6= 2.4 Hz, *J*7b,7a= 13.6 Hz, *J*7b,8= 11.3 Hz, H7b), 0.90, 0.88 (2s, 18H, Si*t*Bu), 0.09, 0.07 (2s, 12H, SiMe2); 13C NMR **108.8 (CMe2), 78.6 (C5), 76.9 (C4), 68.4, 66.7 (C3,6), 52.7 (C1), 51.5 (C8), 33.7, 31.0 (C2,7), 27.7, 27.5 (CMe2), 26.0 (SiC(CH3)3), 18.2 (SiC(CH3)3), -4.1, -4.8, -5.1 (SiMe2); HRMS for C23H47O5Si2 (M++1): calcd 459.2962; found 459.2958.

**4- Formation of cyclic sulfates**

To a solution of diol (0.84 mmol) in CH2Cl2 (8 mL) at 0°C were added triethylamine (3.36 mmol, 4 equiv.) and thionyle chloride (2.94 mmol, 3.5 equiv.). The mixture was stirred at 0°C for 10 min, then diluted with diethyl ether (12 mL) and washed with cold water (12 mL). The organic layer was then dried (MgSO4), filtered and concentrated in vacuo. The residue was dissolved in CCl4 (8 mL) and acetonitrile (8 mL). The solution was cooled to 0°C and cold water (12 mL) was added. Ruthenium chloride (0.034 mmol, 4 mol%) and sodium periodate (1.26 mmol, 1.5 equiv.) were added. After stirring at 20°C for 1h, diethyl ether (16 mL) was added and the two layers were separated. The aqueous layer was extracted three times with diethyl ether and the combined organic layers were dried (MgSO4), filtered and concentrated in vacuo. Flash chromatography of the crude led to pure cyclic sulfate derivatives.

**4.1- (1*S*,2*S*,3*S*,4*S*,6*R*,7*S*)-1,4-Di-*O*-*tert*-butyldimethylsilyl-2,3-*O*-methylethylidene-6,7-*O*-sulfonyl-cyclooctane-1,2,3,4,6,7-hexol (9).**

Isolated yield: 100%; *Rf* 0.3 (cyclohexane/EtOAc 96:4); mp 110°C; []D= +72 (*c*1.0, CH2Cl2); 1H NMR ** 5.36 (ddd, 1H, *J*8,1= 5.6 Hz, *J*8,7a= 3.3 Hz, *J*8,7b= 11.4 Hz, H8), 4.89 (ddd, 1H, *J*1,2a= 11.4 Hz, *J*1,8= 5.6 Hz, H1), 3.89 (ddd, 1H, *J*6,5= 8.6 Hz, *J*6,7a= 4.4 Hz, *J*6,7b= 2.6 Hz, H6), 3.72 (ddd, 1H, *J*3,2a= 10.8 Hz, *J*3,2b= 4.4 Hz, *J*3,4= 8.4 Hz, H3), 3.60 (dd, 1H, *J*5,4= 8.5 Hz, *J*5,6= 8.6 Hz, H5), 3.24 (dd, 1H, *J*4,3= 8.4 Hz, *J*4,5= 8.5 Hz,H4), 2.42 (ddd, 1H, *J*2a,1= 11.4 Hz, *J*2a,2b= 15.2 Hz, *J*2a,3= 10.8 Hz, H2a), 2.28 (ddd, 1H, *J*7a,6= 4.4 Hz, *J*7a,7b= 14.6 Hz, *J*7a,8= 3.3 Hz, H7a), 2.19–2.02 (m, 2H, H2b,7b), 1.35, 1.33 (2s, 6H, CH3), 0.88, 0.87 (2s, 18H, Si*t*Bu), 0.08, 0.07, 0.06, 0.04 (4s, 12H, SiMe2); 13C NMR **109.2 (CMe2), 82.1, 81.0 (C1,8), 80.7, 79.9 (C4,5), 73.7 (C3), 71.5 (C6), 35.7, 32.5 (C2,7), 27.0, 26.6 (CMe2), 25.7 (SiC(CH3)3), 18.2, 18.0 (SiC(CH3)3), -4.3, -4.4, -5.0, -5.2 (SiMe2); HRMS for C23H47O8SSi2 (M++1): calcd 539.2530; found 539.2536.

**4.2- (1*R*,2*S*,3*S*,4*R*,6*R*,7*S*)-1,4-Di-*O*-*tert*-butyldimethylsilyl-2,3-*O*-methylethylidene-6,7-*O*-sulfonyl-cyclooctane-1,2,3,4,6,7-hexol (10).**

Isolated yield: 80%; *Rf* 0.3 (cyclohexane/EtOAc 95:5); mp 180-181°C; []D= -16 (*c*1.0, CH2Cl2); 1H NMR ** 5.34 (ddd, 1H, *J*1,2a= 2.6 Hz, *J*1,2b= 9.1 Hz, *J*1,8= 6.2 Hz, H1), 5.00 (ddd, 1H, *J*8,1= 6.2 Hz, *J*8,7a= 2.3 Hz, *J*8,7b= 12.2 Hz, H8), 4.30 (ddd, 1H, *J*3,2a= 6.4 Hz, *J*3,2b= 2.2 Hz, *J*3,4= 2.3 Hz, H3), 4.10 (ddd, 1H, *J*6,5= 3.1 Hz, *J*6,7a= 6.8 Hz, *J*6,7b= 10.8 Hz, H6), 4.02 (dd, 1H, *J*4,3= 2.3 Hz, *J*4,5= 8.0 Hz, H4), 3.68 (dd, 1H, *J*5,4= 8.0 Hz, *J*5,6= 3.1 Hz,H5), 2.41 (ddd, 1H, *J*7a,6= 6.8 Hz, *J*7a,7b= 14.5 Hz, *J*7a,8= 2.3 Hz, H7a), 2.33–2.17 (m, 2H, H2a,2b), 1.93 (ddd, 1H, *J*7b,6= 10.8 Hz, *J*7b,7a= 14.5 Hz, *J*7b,8= 12.2 Hz, H7b), 1.37, 1.36 (2s, 6H, CH3), 0.88, 0.87 (2s, 18H, Si*t*Bu), 0.13, 0.11, 0.10, 0.08 (4s, 12H, SiMe2); 13C NMR **110.0 (CMe2), 80.4 (C1), 79.2 (C8), 77.3 (C4), 75.4 (C5), 65.8 (C3), 65.4 (C6), 33.9 (C2), 32.6 (C7), 27.7, 27.4 (CMe2), 26.0 (SiC(CH3)3), 18.1 (SiC(CH3)3), -5.3 (SiMe2); Anal. calcd for C23H46O8SSi2: C, 51.27; H, 8.60; found C, 51.19; H, 8.70.

**5- Cyclic sulfate opening**

To a solution of cyclic-sulfate (1.49 mmol) in DMF (2 mL) was added sodium azide (7.43 mmol, 5 equiv.). The mixture was then stirred at 80°C for 1h, then concentrated in vacuo. The residue was dissolved in THF (15 mL), then sulfuric acid (75 L) and water (20 L) were added. After stirring at 20°C for 1h, excess sodium carbonate was added and after stirring for 20 min, the mixture was filtered through celite and concentrated in vacuo. Flash chromatography of the crude led to pure azido-alcool derivatives.

**5.1- (1*S*,2*S*,3*S*,4*S*,6*S*,7*S*)-7-Azido-1,4-di-*O*-*tert*-butyldimethylsilyl-2,3-*O*-methylethylidene-cyclooctane-1,2,3,4,6-pentol (11).**

Isolated yield: 95%; *Rf* 0.2 (cyclohexane/EtOAc 95:5); mp 69-70°C; []D= +12 (*c*1.0, CH2Cl2); 1H NMR ** 4.04 (dd*l*, 1H, *J*3,2a= 6.5 Hz, *J*3,4= 4.2 Hz, H3), 3.94 (dd, 1H, *J*6,5= 6.3 Hz, *J*6,7a= 1.8 Hz, *J*6,7b= 5.5 Hz, H6), 3.73 (ddd, 1H, *J*8,1= 9.5 Hz, *J*8,7a= 8.8 Hz, *J*8,7b= 1.5 Hz, H8), 3.73 (ddd, 1H, *J*1,2a= 2.2 Hz, *J*1,2b= 9.0 Hz, *J*1,8= 9.5 Hz, H1), 3.59 (dd, 1H, *J*5,4= 9.5 Hz, *J*5,6= 6.3 Hz,H5), 3.50 (dd, 1H, *J*4,3= 4.2 Hz, *J*4,5= 9.5 Hz, H4), 2.06 (ddd, 1H, *J*2a,1= 2.2 Hz, *J*2a,2b= 15.4 Hz, *J*2a,3= 6.5 Hz,H2a), 2.06 (ddd, 1H, *J*7a,6= 1.8 Hz, *J*7a,7b= 15.4 Hz, *J*7a,8= 8.8 Hz,H7a), 1.95 (ddd, 1H, *J*7b,6= 5.5 Hz, *J*7b,7a= 15.4 Hz, *J*7b,8= 1.5 Hz, H7b), 1.90 (ddd, 1H, *J*2b,1= 9.0 Hz, *J*2b,2a= 15.4 Hz, *J*2b,3= 1.5 Hz, H2b), 1.31 (s, 6H, CH3), 0.90, 0.88 (2s, 18H, Si*t*Bu), 0.10, 0.09, 0.08 (3s, 12H, SiMe2); 13C NMR **107.3 (CMe2), 77.5, 77.3 (C4,5), 69.6 (C8), 66.0 (C3,6), 64.1 (C1), 39.4, 36.6 (C2,7), 27.2 (CMe2), 26.0 (SiC(CH3)3), 18.2, 18.1 (SiC(CH3)3), -4.5, -4.8, -4.9, -5.1 (SiMe2); HRMS for C23H47O5NSi2 (M+-N2+1): calcd 474.3071; found 474.3065.

**5.2- (1*R*,2*S*,3*S*,4*R*,6*R*,7*R*)-7-Azido-1,4-di-*O*-*tert*-butyldimethylsilyl-2,3-*O*-methylethylidene-cyclooctane-1,2,3,4,6-pentol (12).**

Isolated yield: 98%; *Rf* 0.2 (cyclohexane/EtOAc 95:5); mp 80-83°C; []D= -33 (*c*1.0, CH2Cl2); 1H NMR ** 4.28 (d, 1H, *J*3,2a= 8.6 Hz, H3), 4.27 (d, 1H, *J*6,7a= 8.6 Hz, H6), 3.97 (d, 1H, *J*4,5= 8.8 Hz, H4), 3.94 (d, 1H, *J*5,4= 8.8 Hz,H5), 3.78 (ddd, 1H, *J*8,1= 9.0 Hz, *J*8,7b= 8.0 Hz, H8), 3.75 (dd, 1H, *J*1,2b= 8.0 Hz, *J*1,8= 9.0 Hz, H1), 2.10 (2dd, 2H, *J*2a,3= *J*7a,6= 8.6 Hz, *J*2a,2b= *J*7a,7b= 15.2 Hz,H2a,7a), 1.86 (dd, 1H, *J*2b,2a= 15.2 Hz, *J*2b,1= 8.0 Hz, H2b), 1.81 (dd, 1H, *J*7b,7a= 15.2 Hz, *J*7b,8= 8.0 Hz, H7b), 1.34 (s, 6H, CH3), 0.92, 0.90 (2s, 18H, Si*t*Bu), 0.11, 0.10, 0.09 (3s, 12H, SiMe2); 13C NMR **107.4 (CMe2), 77.8, 77.6 (C4,5), 69.8 (C8), 66.2 (C3,6), 64.4 (C1), 39.6, 36.9 (C2,7), 27.3 (CMe2), 26.0, 25.9 (SiC(CH3)3), 18.2, 18.1 (SiC(CH3)3), -4.4, -4.8, -5.0, -5.2 (SiMe2); HRMS for C23H48N3O5Si2 (M++1): calcd 502.3133; found 502.3141.

**6- Azido group reduction**

To a suspension of palladium black (100 mg) in ethyl acetate (4 mL) saturated with dihydrogen was added a solution of azido-alcool (1.2 mmol) in ethyl acetate (2 mL). After stirring for 3h, the catalyst was discarded by filtration through celite and the filtrate was concentrated in vacuo. The corresponding aminocyclooctane derivative was isolated as a white solid, and submitted to the reductive amination without purification.

**6.1- (1*S*,2*S*,3*S*,4*S*,6*S*,7*S*)-7-Amino-1,4-di-*O*-*tert*-butyldimethylsilyl-2,3-*O*-methylethylidene-cyclooctane-1,2,3,4,6-pentol (13).**

1H NMR ** 4.00 (ddd, 1H, *J*6,5= 4.7 Hz, *J*6,7a= 6.2 Hz, *J*6,7b= 1.5 Hz, H6), 3.89 (ddd, 1H, *J*3,2a= 1.9 Hz, *J*3,2b= 5.5 Hz, *J*3,4= 5.6 Hz, H3), 3.61 (dd, 1H, *J*4,3= 5.6 Hz, *J*4,5= 9.3 Hz, H4), 3.52 (dd, 1H, *J*5,4= 9.3 Hz, *J*5,6= 4.7 Hz, H5), 3.49 (ddd, 1H, *J*8,1= 8.5 Hz, *J*8,7a= 2.1 Hz, *J*8,7b= 7.5 Hz, H8), 2.87 (ddd, 1H, *J*1,2a= 6.9 Hz,  *J*1,2b= 1.6 Hz, *J*1,8= 8.5 Hz, H1), 2.06 (ddd, 1H, *J*7a,6= 6.2 Hz, *J*7a,7b= 15.4 Hz, *J*7a,8= 2.1 Hz, H7a), 1.93 (ddd, 1H, *J*2a,1= 6.9 Hz, *J*2a,2b= 15.1 Hz, *J*2a,3= 1.9 Hz, H2a), 1.87 (ddd, 1H, *J*7b,6= 1.5 Hz, *J*7b,7a= 15.1 Hz, *J*7b,8= 7.5 Hz, H7b), 1.73 (ddd, 1H, *J*2b,1= 1.6 Hz, *J*2b,2a= 15.1 Hz, *J*2b,3= 5.5 Hz, H2b), 1.30 (s, 6H, CH3), 0.89, 0.88 (2s, 18H, Si*t*Bu), 0.09, 0.08, 0.06 (3s, 12H, SiMe2); 13C NMR **107.6 (CMe2), 82.8, 82.0 (C4,5), 72.2 (C8), 71.5 (C3), 70.3 (C6), 51.7 (C1), 40.9 (C2), 38.6 (C7), 26.8 (CMe2), 25.8 (SiC(CH3)3), 18.1 (SiC(CH3)3), -4.7, -5.1 (SiMe2); HRMS for C23H50NO5Si2 (M++1): calcd 476.3228; found 476.3220.

**6.2- (1*R*,2*S*,3*S*,4*R*,6*R*,7*R*)-7-Amino-1,4-di-*O*-*tert*-butyldimethylsilyl-2,3-*O*-methylethylidene-cyclooctane-1,2,3,4,6-pentol (14).**

1H NMR ** 4.24 (d*l*, 1H, *J*6,7b= 8.9 Hz, H6), 4.20 (d*l*, 1H, *J*3,2a= 9.5 Hz, H3), 3.99 (dd, 1H, *J*4,3= 1.3 Hz, *J*4,5= 8.7 Hz, H4), 3.93 (dd, 1H, *J*5,4= 8.7 Hz, *J*5,6= 1.3 Hz, H5), 3.51 (dd*l*, 1H, *J*8,1= 7.8 Hz, *J*8,7a= 8.7 Hz, H8), 2.93 (dd, 1H, *J*1,2b= 8.6 Hz, *J*1,8= 7.8 Hz, H1), 2.51 (s*l*, 3H, OH8, (NH2)1), 2.16 (ddd, 1H, *J*7a,6= 1.1 Hz, *J*7a,7b= 14.9 Hz, *J*7a,8= 8.7 Hz,H7a), 1.94 (dd*l*, 1H, *J*2a,2b= 15.2 Hz, *J*2a,3= 8.2 Hz, H2a), 1.74 (dd, 1H, *J*2b,1= 8.6 Hz, *J*2b,2a= 15.2 Hz, H2b), 1.68 (ddd, 1H, *J*7b,6= 8.9 Hz, *J*7b,7a= 14.9Hz, *J*7b,8= 0.8 Hz, H7b), 1.33 (s, 6H, CH3), 0.88 (s, 18H, Si*t*Bu), 0.08, 0.07, 0.06, 0.05 (4s, 12H, SiMe2); 13C NMR **106.5 (CMe2), 78.2 (C4,5), 69.6 (C8), 67.3 (C3), 67.1 (C6), 51.1 (C1), 43.3 (C2), 41.3 (C7), 27.3 (CMe2), 26.0, 25.9 (SiC(CH3)3), 18.1 (SiC(CH3)3), -4.5, -4.9 (SiMe2); HRMS for C23H50NO5Si2 (M++1): calcd 476.3228; found 476.3223.

**7- Reductive amination**

To the primary amine (0.21 mmol) at 20°C, were successively added titanium(IV) tetra-isopropoxide (0.47 mmol, 2.25 equiv.) and 2,2-dimethyl-1,3-dioxan-5-one (0.32 mmol, 1.5 equiv.). After stirring for 3h, absolute ethanol (0.17 mL) and sodium cyanoborohydride (1.26 mmol, 6 equiv.) were added and the mixture was stirred overnight at 20°C. Addition of water (0.2 mL) resulted in the formation of a white precipitate which was filtered and washed with absolute ethanol. Concentration of the filtrate was followed by extraction of the residue with ethyl acetate, filtration and concentration in vacuo. The oily residue was then dissolved in CH2Cl2, stirred in the presence of sodium hydrogencarbonate, filtered and concentrated in vacuo. Flash chromatography of the crude led to pure secondary amine.

**7.1- (1*S*,2*S*,3*S*,4*S*,6*S*,7*S*)-7-(2,2-Dimethyl-[1,3]dioxan-5-ylamino)-1,4-di-*O*-*tert*-butyldimethylsilyl-2,3-*O*-methylethylidene-cyclooctane-1,2,3,4,6-pentol (17).**

Isolated yield: 46%; *Rf* 0.3 (cyclohexane/EtOAc 9:1); []D= +4 (*c*1.0, CH2Cl2); 1H NMR ** 3.94 (ddd, 1H, *J*3,2a= *J*3,2b= 3.1 Hz, *J*3,4= 6.9 Hz, H3), 3.92 (ddd, 1H, *J*6,5= 7.1 Hz, *J*6,7a= 3.6 Hz, *J*6,7b= 3.4 Hz, H6), 3.79 (d, 1H, *J*1'a,1'b= 11.7 Hz, H1'a), 3.72 (dd, 1H, *J*4,3= 6.9 Hz, *J*4,5= 7.3 Hz, H4), 3.72 (d, 1H, *J*3'a,3'b= 11.7 Hz, H3'a), 3.67 (dd, 1H, *J*5,4= 7.3 Hz, *J*5,6= 7.4 Hz, H5), 3.59 (d, 1H, *J*1'b,1'a= 11.7 Hz, H1'b), 3.55 (dd, 1H, *J*8,1= 9.2 Hz, *J*8,7b= 10.3 Hz, H8), 3.54 (d, 1H, *J*3'b,3'a= 11.7 Hz, H3'b), 3.00 (dd, 1H, *J*1,2b= 10.0 Hz, *J*1,8= 9.2 Hz, H1), 2.12 (dd, 1H, *J*7a,6= 3.5 Hz, *J*7a,7b= 15.1 Hz, H7a), 1.98 (dd, 1H, *J*2a,2b= 15.0 Hz, *J*2a,3= 3.1 Hz, H2a), 1.87 (ddd, 1H, *J*7b,6= 3.4 Hz, *J*7b,7a= 15.1 Hz, *J*7b,8= 10.3 Hz, H7b), 1.80 (ddd, 1H, *J*2b,1= 10.0 Hz, *J*2b,2a= 15.0 Hz, *J*2b,3= 3.1 Hz, H2b), 1.43, 1.41 (2s, 6H, CH3'), 1.32 (s, 6H, CH3), 0.88, 0.87 (2s, 18H, Si*t*Bu), 0.09, 0.07, 0.06, 0.05 (4s, 12H, SiMe2); 13C NMR **109.4 (CMe2), 98.9 (CMe'2), 82.2, 82.0 (C4,5), 78.8 (C8), 74.1 (C3), 73.8 (C6), 68.0 (C1'), 67.4 (C3'), 57.3 (C1), 37.1 (C7), 35.7 (C2), 26.9 (CMe2), 25.8 (SiC(CH3)3), 25.0 (CMe'2), 18.1 (SiC(CH3)3), -4.5, -4.9, -5.6 (SiMe2); Anal. calcd for C29H59NO7Si2: C, 59.04; H, 10.08; N, 2.37; found C, 59.04; H, 10.01; N, 2.38.

**7.2- (1*R*,2*S*,3*S*,4*R*,6*R*,7*R*)-7-(2,2-Dimethyl-[1,3]dioxan-5-ylamino)-1,4-di-*O*-*tert*-butyldimethylsilyl-2,3-*O*-methylethylidene-cyclooctane-1,2,3,4,6-pentol (18).**

Isolated yield: 58%; *Rf* 0.4 (cyclohexane/acetone 85:15); []D= -33 (*c*1.0, CH2Cl2); 1H NMR ** 4.32-4.23 (m, 2H,H3,6), 4.04 (d, 1H, *J*4,5= 8.4 Hz, H4), 3.98 (d, 1H, *J*5,4= 8.4 Hz, H5), 3.75 (d, 1H, *J*1'a,1'b= 11.6 Hz, H1'a), 3.71 (dd, 1H, *J*8,1= *J*8,7b= 9.2 Hz, H8), 3.67 (d, 1H, *J*3'a,3'b= 11.6 Hz, H3'a), 3.56 (d, 1H, *J*1'b,1'a= 11.6 Hz, H1'b), 3.51 (d, 1H, *J*3'b,3'a= 11.6 Hz, H3'b), 3.17 (dd, 1H, *J*1,2b= *J*1,8= 9.2 Hz, H1), 2.33 (dd*l*, 1H, *J*7a,6= 7.6 Hz, *J*7a,7b= 14.5 Hz, H7a), 2.21 (dd*l*, 1H, *J*2a,2b= 14.1 Hz, *J*2a,3= 7.3 Hz, H2a), 1.57 (ddd, 1H, *J*7b,6= 7.0 Hz, *J*7b,7a= 14.5 Hz, *J*7b,8= 9.2 Hz, H7b), 1.51 (ddd, 1H, *J*2b,1= 9.2 Hz, *J*2b,2a= 14.1 Hz, *J*2b,3= 6.3 Hz, H2b), 1.40 (s, 6H, CH3'), 1.31 (s, 6H, CH3), 0.89, 0.88 (2s, 18H, Si*t*Bu), 0.07 (s, 12H, SiMe2); 13C NMR **106.1 (CMe2), 98.8 (CMe'2), 87.4 (C2'), 78.3 (C8), 78.2, 78.1 (C4,5), 68.1, 67.9 (C3,6), 67.7, 67.2 (C1',3'), 56.6 (C1), 38.9 (C7), 37.7 (C2), 27.3 (CMe2), 26.9 (CMe'2), 25.9 (SiC(CH3)3), 18.1 (SiC(CH3)3), -4.5, -4.8 (SiMe2); HRMS for C29H60NO7Si2 (M++1): calcd 590.3908; found 590.3924.

**8- Deprotection of the aminocyclooctanols**

The substrate (0.21 mmol) was stirred in a 9:1 solution of trifluoroacetic acid/H2O at 20°C for 15h. After concentration in vacuo, the resulting oily residue was triturated in diethyl ether and the supernatant was discarded to afford a brownish solid which was then purified by ion-exchange chromatography (Dowex® 50x8-100, 1% aqueous ammonium hydroxide).

**8.1-(1*S*,2*R*,3*R*,4*S*,6*S*,7*S*)-7-Amino-cyclooctane-1,2,3,4,6-pentol (15).**

Isolated yield: 95%; []D +8 (*c*1.0, H2O); 1H NMR (D2O) **3.94 (ddd, 1H, *J*3,2a= 4.3 Hz, *J*3,2b= 7.7 Hz, *J*3,4= 8.1 Hz, H3), 3.93 (ddd, 1H, *J*6,5= *J*6,7a= 7.8 Hz, *J*6,7b= 3.8 Hz, H6), 3.69 (ddd, 1H, *J*8,1= 9.6 Hz, *J*8,7a= 3.8 Hz, *J*8,7b= 6.1 Hz, H8), 3.55 (dd, 1H, *J*4,3= 8.1 Hz, *J*4,5= 8.5 Hz, H4), 3.44 (dd, 1H, *J*5,4= 8.5 Hz, *J*5,6= 7.8 Hz, H5), 3.06 (ddd, 1H, *J*1,2a= 9.4 Hz, *J*1,2b= 3.0 Hz, *J*1,8= 9.6 Hz, H1), 2.20-2.05 (m, 3H,H2a,7a,7b), 1.92 (ddd, 1H, *J*2b,1= 3.1 Hz, *J*2b,2a= 15.3 Hz, *J*2b,3= 7.7 Hz, H2b); 13C NMR (D2O) **77.8, 77.4 (C4,5), 72.9 (C8), 71.2, 70.9 (C3,6), 55.4 (C1), 40.7 (C7), 40.1 (C2); HRMS for C8H18O5N (M++1): calcd 208.1185; found 208.1186.

**8.2- (1*R*,2*R*,3*R*,4*R*,6*R*,7*R*)-7-Amino-cyclooctane-1,2,3,4,6-pentol (16).**

Isolated yield: 68%; []D -15 (*c*1.0, H2O); 1H NMR (D2O) **4.24 (2ddd, 2H, *J*3,2a= *J*6,7b= 7.1 Hz, *J*3,2b= *J*6,7a= 2.5 Hz, *J*3,4= *J*6,5= 1.4 Hz, H3,6), 3.96 (dd, 1H, *J*5,4= 7.1 Hz, *J*5,6= 1.4 Hz, H5), 3.91 (dd, 1H, *J*4,3= 1.4 Hz, *J*4,5= 7.1 Hz, H4), 3.78 (ddd, 1H, *J*8,1= 9.1 Hz, *J*8,7a= 6.2 Hz, *J*8,7b= 3.4 Hz, H8), 3.16 (ddd, 1H, *J*1,2a= 3.4 Hz, *J*1,2b= 7.1 Hz, *J*1,8= 9.1 Hz, H1), 2.10 (ddd, 1H, *J*7a,6= 2.5 Hz, *J*7a,7b= 15.5 Hz, *J*7a,8= 6.2 Hz, H2b), 2.08-1.80 (m, 3H,H2a,2b,7b); 13C NMR (D2O) **75.2 (C8), 71.8 (C4,5), 68.6 (C3,6), 54.3 (C1), 38.7 (C7), 35.5 (C2); HRMS for C8H18O5N (M++1): calcd 208.1185; found 208.1183.

**8.3- (1*S*,2*R*,3*R*,4*S*,6*S*,7*S*)-7-(2-Hydroxy-1-hydroxymethyl-ethylamino)-cyclooctane-1,2,3,4,6-pentol (19).**

Isolated yield: 100%; []D +14 (*c*1.0, H2O); 1H NMR (D2O) **3.88-3.70 (m, 2H, H3,6), 3.95-3.40 (m, 4H,H1',3'), 3.55 (ddd, 1H, *J*8,1= 9.8 Hz, *J*8,7a= 5.5 Hz, *J*8,7b= 4.8 Hz, H8), 3.40 (dd, 1H, *J*4,3= *J*4,5= 8.3 Hz, H4), 3.31 (dd, 1H, *J*5,4= *J*5,6= 8.3 Hz, H5), 2.87 (ddd, *J*1,2a= 4.1 Hz, *J*1,2b= 3.3 Hz, *J*1,8= 9.8 Hz, H1), 2.20-2.00 (m, 2H, H7a,7b), 1.94 (ddd, 1H, *J*2a,1= 4.1 Hz, *J*2a,2b= 15.3 Hz, *J*2a,3= 8.2 Hz, H2a), 1.80 (ddd, *J*2b,1= 3.3 Hz, *J*2b,2a= 15.3 Hz, *J*2b,3= 7.8 Hz, H2b); 13C NMR (D2O) **79.7, 77.8 (C4,5), 75.0 (C8), 71.4 (C3,6,1',3'), 53.6 (C1), 42.0 (C7), 40.8 (C2); HRMS for C11H24NO7 (M++1): calcd 282.1553; found 282.2779.

**8.4- (1*R*,2*R*,3*R*,4*R*,6*R*,7*R*)-7-(2-Hydroxy-1-hydroxymethyl-ethylamino)-cyclooctane-1,2,3,4,6-pentol (20).**

Isolated yield: 50%; []D -1 (*c*1.0, H2O); 1H NMR (D2O) **4.22-4.08 (m, 2H,H3,6), 3.95-3.40 (m, 7H,H4,5,8,1',3'), 3.20-3.10 (m, 1H, H1), 2.10-1.70 (m, 4H,H2a,2b,7a,7b); 13C NMR (D2O) **75.4 (C8), 74.8, 73.8 (C4,5), 69.6 (C3,6), 54.3 (C1), 39.4 (C7), 37.5 (C2); HRMS for C11H24NO7 (M++1): calcd 282.1553; found 282.1556.

**9- Inhibition studies**

The inhibition studies were performed according to the procedure previously described. 40,41 In the specific case of -D-glucosidase from *Bacillus stearothermophilus*, -D-glucosidase from almonds, -D-mannosidase from Jack beans and -L-fucosidase from bovine kidney, the biological tests have been carried out as explained in reference 19. Whatever the conditions were, we verified that the delay of inhibtor/enzyme incubation did not affect the inhibition measurements. Under standard conditions optimal inhibitory activities were measured after five minutes of incubation.

**10- X-ray crystallography**

Diffraction data for compounds **7** and **9** were recorded at the LURE synchrotron facility in Orsay, at 100(1) K. The wavelength was fixed to 0.964 Å the detector was a MAR RESEARCH 345 image plate. Both structures were solved using SHELXS and anisotropically refined using SHELXL programs.38 **7**: Space group P212121; a=6.729(1); b=15.246(2); c=27.044(2) Å and Z=4. Final *R* = 0.041 for 1490 observed *Fs* and *R* = 0.043 for all data (2010 *Fs*). **9**: Space group P21; a=12.259(1); b=10.990(1); c=22.990(2) Å; =90.86(4)° and Z=4. Final *R* = 0.050 for 2937 observed *Fs* and *R* = 0.052 for all data (3030 *Fs*). Structure data were deposited with the Cambridge Crystallography Data Centre under ref. CCDC 266247 and CCDC 266248 respectively.
